# Supplementary material for: A Parallel Tracking of Salivary and Gut Microbiota Profiles Can Reveal Maturation and Interplay of Early Life Microbial Communities in Healthy Infants
Source: MDPI journal article supplement (doi:10.3390/microorganisms10020468), 2022-02-18
Supplement: s1 [file s1]

## Supplementary Materials

### Supplementary Tables:

**Supplementary Table S1.** Wilcoxon test between saliva and stool  $\alpha$ -diversity indices at each time point of follow-up.

| Alpha diversity indexes | time point | Saliva median | Stool median | FDR p value |
|-------------------------|------------|---------------|--------------|-------------|
| Chao1                   | 7 days     | 36.50         | 14.00        | 0.0078      |
|                         | 15 days    | 76.00         | 19.50        | 0.0002      |
|                         | 30 days    | 47.63         | 26.00        | 0.0238      |
|                         | 90 days    | 43.20         | 19.50        | 0.0164      |
|                         | 180 days   | 55.20         | 17.00        | 0.0005      |
| Shannon                 | 7 days     | 1.88          | 1.26         | 0.0112      |
|                         | 15 days    | 2.82          | 1.51         | 0.0028      |
|                         | 30 days    | 2.13          | 1.98         | 0.1533      |
|                         | 90 days    | 2.20          | 1.47         | 0.0195      |
|                         | 180 days   | 2.62          | 1.64         | 0.0019      |

**Supplementary Table S2.** Average of relative abundances of OTUs shared in saliva samples (core saliva microbiota) in all time-course points.

| Genus                 | 7 days | 15 days | 30 days | 90 days | 180 days |
|-----------------------|--------|---------|---------|---------|----------|
| <i>Rothia</i>         | 0.013  | 0.010   | 0.018   | 1.615   | 0.217    |
| <i>Staphylococcus</i> | 17.630 | 18.948  | 15.391  | 16.996  | 12.791   |
| <i>Streptococcus</i>  | 71.308 | 77.453  | 79.661  | 75.874  | 66.999   |
| <i>Gemellaceae_g</i>  | 6.494  | 1.008   | 0.714   | 0.944   | 2.322    |
| <i>Veillonella</i>    | 0.006  | 0.041   | 0.098   | 1.583   | 4.976    |

**Supplementary Table S3.** Average of relative abundances of OTUs shared in faecal samples (core gut microbiota) in all points of the time-course.

| Genus                  | BIRTH  | 7 days | 15 days | 30 days | 90 days | 180 days |
|------------------------|--------|--------|---------|---------|---------|----------|
| Enterobacteriaceae_g   | 81.186 | 13.110 | 21.255  | 26.289  | 14.122  | 14.749   |
| <i>Erwinia</i>         | 0.012  | 0.022  | 0.141   | 0.277   | 0.034   | 0.176    |
| <i>Klebsiella</i>      | 0.024  | 0.011  | 0.035   | 0.027   | 0.023   | 0.181    |
| <i>Bacteroides</i>     | 3.458  | 4.180  | 13.095  | 8.197   | 1.295   | 0.191    |
| <i>Parabacteroides</i> | 0.002  | 0.001  | 0.012   | 0.222   | 0.007   | 0.003    |
| <i>Bifidobacterium</i> | 0.142  | 0.013  | 2.271   | 6.935   | 41.467  | 13.901   |
| <i>Akkermansia</i>     | 0.001  | 0.002  | 0.023   | 0.183   | 0.009   | 0.106    |
| <i>Staphylococcus</i>  | 0.002  | 4.031  | 1.249   | 0.153   | 0.350   | 0.031    |
| <i>Enterococcus</i>    | 0.001  | 0.038  | 0.015   | 0.121   | 0.643   | 0.607    |
| <i>Streptococcus</i>   | 0.067  | 1.592  | 0.520   | 1.455   | 4.068   | 3.051    |
| Ruminococcaceae_g      | 0.105  | 0.005  | 0.012   | 1.405   | 0.788   | 0.146    |
| Lachnospiraceae_g      | 0.087  | 0.005  | 0.036   | 0.118   | 0.114   | 0.059    |
| <i>Clostridium</i>     | 0.001  | 0.002  | 0.004   | 0.005   | 0.008   | 0.010    |
| <i>Veillonella</i>     | 0.347  | 0.022  | 0.378   | 0.175   | 0.301   | 1.528    |

**Supplementary Table S4.** OTUs shared between the gut and salivary microbiota of the cohort of infants at each point of the time course.

| Shared OTUs <sup>a</sup>     |                              |                              |                              |                              |
|------------------------------|------------------------------|------------------------------|------------------------------|------------------------------|
| 7 days                       | 15 days                      | 30 days                      | 90 days                      | 180 days                     |
| <b><i>Streptococcus</i></b>  | <b><i>Streptococcus</i></b>  | <b><i>Streptococcus</i></b>  | <b><i>Streptococcus</i></b>  | <b><i>Streptococcus</i></b>  |
| <b><i>Staphylococcus</i></b> | <b><i>Staphylococcus</i></b> | <b><i>Staphylococcus</i></b> | <b><i>Staphylococcus</i></b> | <b><i>Staphylococcus</i></b> |
| <b><i>Veillonella</i></b>    | <b><i>Veillonella</i></b>    | <b><i>Veillonella</i></b>    | <b><i>Veillonella</i></b>    | <b><i>Veillonella</i></b>    |
| <i>Haemophilus</i>           | Planococcaceae_g             | Enterobacteriaceae_g         | Enterobacteriaceae_g         | <i>Gemella</i>               |
| <i>Acinetobacter</i>         | Enterobacteriaceae_g         |                              | <i>Corynebacterium</i>       | Planococcaceae_g             |
| <i>Gemella</i>               | Gemellaceae_g                |                              | <i>Haemophilus</i>           | Gemellaceae_g                |
| Planococcaceae_g             |                              |                              | Gemellaceae_g                | <i>Granulicatella</i>        |
| <i>Rothia</i>                |                              |                              |                              | <i>Haemophilus</i>           |
| Gemellaceae_g                |                              |                              |                              | <i>Prevotella</i>            |

<sup>a</sup> in bold are highlighted OTUs shared between gut and salivary microbiota in all points of the time course.

**Supplementary Table S5.** Characteristics of networks of saliva, stool and saliva versus stool samples.

|                            | <i>Saliva</i> |                |                |                |                 | <i>Stool</i> |               |                |                |                |                 | <i>Stool vs. Saliva</i> |                |                |                |                 |
|----------------------------|---------------|----------------|----------------|----------------|-----------------|--------------|---------------|----------------|----------------|----------------|-----------------|-------------------------|----------------|----------------|----------------|-----------------|
|                            | <i>7 days</i> | <i>15 days</i> | <i>30 days</i> | <i>90 days</i> | <i>180 days</i> | <i>Birth</i> | <i>7 days</i> | <i>15 days</i> | <i>30 days</i> | <i>90 days</i> | <i>180 days</i> | <i>7 days</i>           | <i>15 days</i> | <i>30 days</i> | <i>90 days</i> | <i>180 days</i> |
| Avg. number of neighbors   | 5.48          | 5.95           | 9.13           | 9.10           | 10.81           | 14.03        | 12.11         | 11.55          | 8.82           | 12.86          | 8.06            | 5.51                    | 5.40           | 8.27           | 5.53           | 6.58            |
| Network diameter           | 12            | 5              | 8              | 10             | 8               | 8            | 8             | 8              | 11             | 9              | 11              | 6                       | 6              | 9              | 8              | 8               |
| Characteristic path length | 3.12          | 1.96           | 3.17           | 4.13           | 3.00            | 3.50         | 3.97          | 2.79           | 4.34           | 3.26           | 4.71            | 2.08                    | 2.27           | 3.96           | 3.21           | 3.45            |
| Clustering coefficient     | 0.73          | 0.77           | 0.84           | 0.83           | 0.79            | 0.94         | 0.90          | 0.92           | 0.83           | 0.87           | 0.85            | 0.00                    | 0.00           | 0.00           | 0.00           | 0.00            |
| Network centralization     | 0.16          | 0.21           | 0.19           | 0.16           | 0.15            | 0.11         | 0.11          | 0.14           | 0.11           | 0.24           | 0.10            | 0.06                    | 0.05           | 0.09           | 0.07           | 0.07            |
| Network heterogeneity      | 0.67          | 0.54           | 0.48           | 0.51           | 0.61            | 0.41         | 0.51          | 0.71           | 0.43           | 0.70           | 0.46            | 0.65                    | 0.40           | 0.51           | 0.57           | 0.55            |
| Network radius             | 1             | 1              | 1              | 5              | 1               | 1            | 1             | 1              | 1              | 1              | 1               | 1                       | 1              | 1              | 1              | 1               |
| Network density            | 0.11          | 0.15           | 0.14           | 0.16           | 0.14            | 0.19         | 0.10          | 0.11           | 0.08           | 0.12           | 0.08            | 0.07                    | 0.09           | 0.09           | 0.07           | 0.07            |
| Connected components       | 6             | 5              | 2              | 1              | 3               | 4            | 2             | 7              | 3              | 4              | 6               | 11                      | 6              | 3              | 7              | 5               |
| Shortest paths             | 722           | 594            | 3666           | 3306           | 4984            | 2346         | 1217          | 2660           | 9714           | 9202           | 5648            | 1230                    | 996            | 8042           | 2228           | 6080            |
| Number of nodes            | 50            | 41             | 64             | 58             | 77              | 75           | 124           | 102            | 105            | 112            | 107             | 78                      | 60             | 98             | 76             | 96              |

## Supplementary Figures

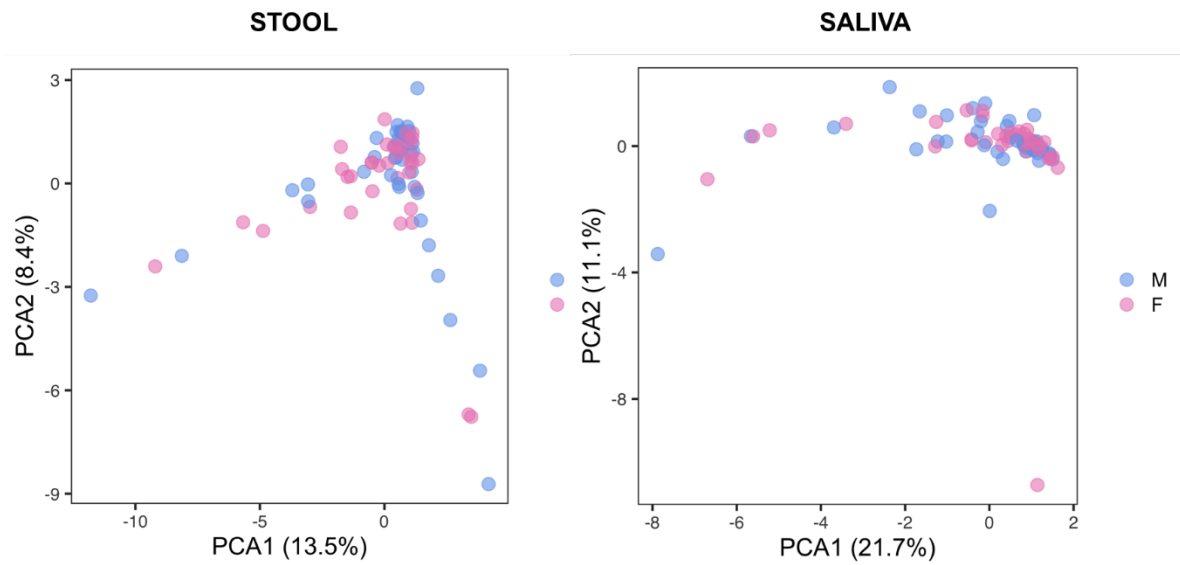

**Supplementary Figure S1.** Principal Component Analysis (PCA) plots applied on OTUs abundances of stool and salivary microbiota of all the children of the study considering gender variable. M, male; F, female.

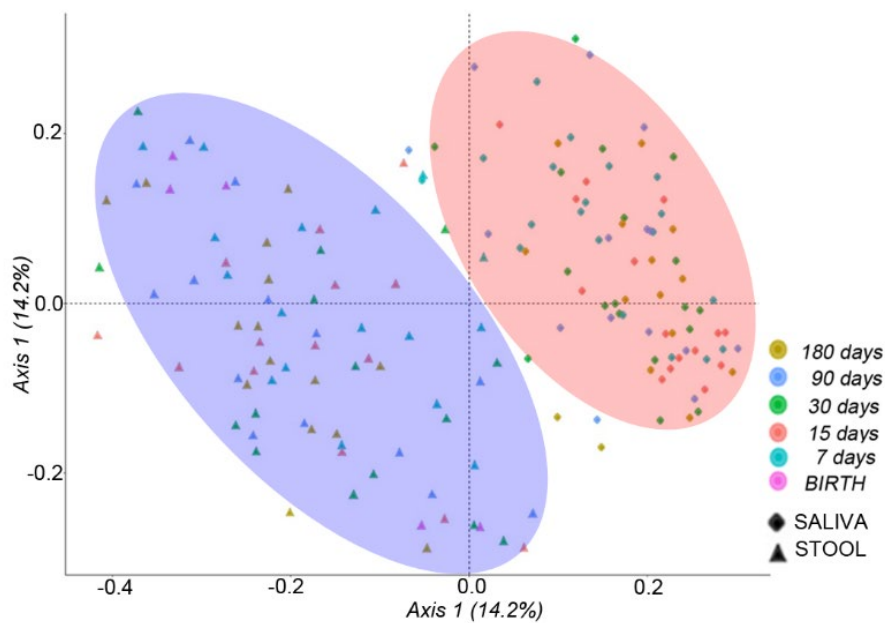

**Supplementary Figure S2.** Principal Coordinates Analysis (PCoA) plots of unweighted UniFrac matrix of all time-points for saliva and stool samples. The shape of the symbols refers to the microbiota matrix, while the color indicates the time point. Red and blue ellipses highlight saliva and stool samples, respectively. The plots show the first two principal axes for PCoA using the unweighted UniFrac algorithm.

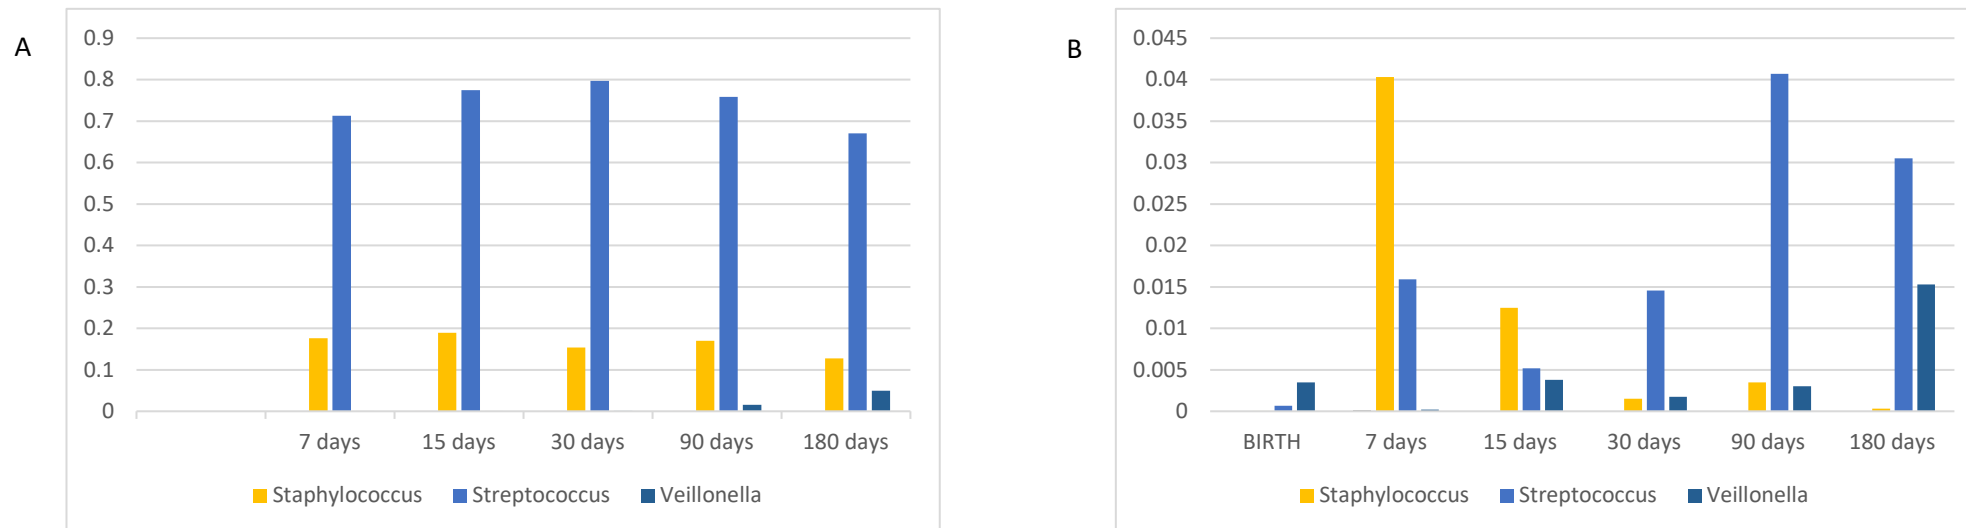

**Supplementary Figure S3.** Colonization trends of the bacterial genera shared in all points of the time course between salivary (A) and gut (B) ecosystems.
